# Supplementary material for: Youth Suicide and Preceding Mental Health Diagnosis
Source: PubMed Central journal article supplement (PMC11289695; doi:10.1001/jamanetworkopen.2024.23996), 2024-07-30
Supplement: jamanetwopen-e2423996-s001.pdf [file jamanetwopen-e2423996-s001.pdf]

## Supplemental Online Content

Chaudhary S, Hoffman JA, Pulcini CD, et al. Youth suicide and preceding mental health diagnosis. *JAMA Netw. Open.* 2024;7(7):e2423996.  
doi:10.1001/jamanetworkopen.2024.23996

**eTable.** Availability of State, Territory, and Jurisdiction Data for NVDRS Web-based Injury Statistics Query and Reporting System (WISQARS) and Restricted Access Database (RAD)

This supplemental material has been provided by the authors to give readers additional information about their work.

**eTable. Availability of State, Territory, and Jurisdiction Data for NVDRS Web-based Injury Statistics Query and Reporting System (WISQARS) and Restricted Access Database (RAD)\***

| VDRS Program         | 2010 | 2011 | 2012 | 2013 | 2014 | 2015 | 2016           | 2017           | 2018           | 2019           | 2020           | 2021           |
|----------------------|------|------|------|------|------|------|----------------|----------------|----------------|----------------|----------------|----------------|
| Alabama              |      |      |      |      |      |      |                |                | √              | √              | √              | √              |
| Alaska               | √    | √    | √    | √    | √    | √    | √              | √              | √              | √              | √              | √              |
| Arizona              |      |      |      |      |      | √    | √              | √              | √              | √              | √              | √              |
| Arkansas             |      |      |      |      |      |      |                |                |                |                | √              | √              |
| California           |      |      |      |      |      |      |                | √ <sup>a</sup> | √ <sup>a</sup> | √ <sup>a</sup> | √ <sup>a</sup> | √ <sup>a</sup> |
| Colorado             | √    | √    | √    | √    | √    | √    | √              | √              | √              | √              | √              | √              |
| Connecticut          |      |      |      |      |      | √    | √              | √              | √              | √              | √              | √              |
| Delaware             |      |      |      |      |      |      |                | √              | √              | √              | √              | √              |
| District of Columbia |      |      |      |      |      |      |                | √              | √              | √              | √              | √              |
| Florida              |      |      |      |      |      |      |                |                |                |                | 0 <sup>b</sup> | 0 <sup>b</sup> |
| Georgia              | √    | √    | √    | √    | √    | √    | √              | √              | √              | √              | √              | √              |
| Hawaii               |      |      |      |      |      | √    | √              | 0 <sup>b</sup> | 0 <sup>b</sup> | √              | 0 <sup>b</sup> | 0 <sup>b</sup> |
| Idaho                |      |      |      |      |      |      |                |                |                |                | √              | √              |
| Illinois             |      |      |      |      |      |      | √ <sup>c</sup> | √ <sup>c</sup> | √ <sup>c</sup> | √ <sup>c</sup> | √              | √              |
| Indiana              |      |      |      |      |      |      | √              | √              | √              | √              | √              | √              |
| Iowa                 |      |      |      |      |      |      | √              | √              | √              | √              | √              | √              |
| Kansas               |      |      |      |      |      | √    | √              | √              | √              | √              | √              | √              |
| Kentucky             | √    | √    | √    | √    | √    | √    | √              | √              | √              | √              | √              | √              |
| Louisiana            |      |      |      |      |      |      |                |                | √              | √              | √              | √              |
| Maine                |      |      |      |      |      | √    | √              | √              | √              | √              | √              | √              |
| Maryland             | √    | √    | √    | √    | √    | √    | √              | √              | √              | √              | √              | √              |
| Massachusetts        | √    | √    | √    | √    | √    | √    | √              | √              | √              | √              | √              | √              |
| Michigan             |      |      |      |      | √    | √    | √              | √              | √              | √              | √              | √              |
| Minnesota            |      |      |      |      |      | √    | √              | √              | √              | √              | √              | √              |
| Mississippi          |      |      |      |      |      |      |                |                |                |                | √              | √              |
| Missouri             |      |      |      |      |      |      |                |                | √              | √              | √              | √              |
| Montana              |      |      |      |      |      |      |                |                |                | √              | √              | √              |
| Nebraska             |      |      |      |      |      |      |                |                | √              | √              | √              | √              |
| Nevada               |      |      |      |      |      |      |                | √              | √              | √              | √              | √              |
| New Hampshire        |      |      |      |      |      | √    | √              | √              | √              | √              | √              | √              |
| New Jersey           | √    | √    | √    | √    | √    | √    | √              | √              | √              | √              | √              | √              |
| New Mexico           | √    | √    | √    | √    | √    | √    | √              | √              | √              | √              | √              | √              |
| New York             |      |      |      |      |      | √    | √              | √              | √              | 0 <sup>b</sup> | √              | √              |
| North Carolina       | √    | √    | √    | √    | √    | √    | √              | √              | √              | √              | √              | √              |
| North Dakota         |      |      |      |      |      |      |                |                |                | √              | √              | √              |
| Ohio                 |      | √    | √    | √    | √    | √    | √              | √              | √              | √              | √              | √              |
| Oklahoma             | √    | √    | √    | √    | √    | √    | √              | √              | √              | √              | √              | √              |

|                       |             |             |             |             |             |             |                |                |                |                |                |                |
|-----------------------|-------------|-------------|-------------|-------------|-------------|-------------|----------------|----------------|----------------|----------------|----------------|----------------|
| <b>Oregon</b>         | √           | √           | √           | √           | √           | √           | √              | √              | √              | √              | √              | √              |
| <b>VDRS Program</b>   | <b>2010</b> | <b>2011</b> | <b>2012</b> | <b>2013</b> | <b>2014</b> | <b>2015</b> | <b>2016</b>    | <b>2017</b>    | <b>2018</b>    | <b>2019</b>    | <b>2020</b>    | <b>2021</b>    |
| <b>Pennsylvania</b>   |             |             |             |             |             |             | √ <sup>c</sup> | √ <sup>c</sup> | √ <sup>c</sup> | √ <sup>c</sup> | √              | √              |
| <b>Puerto Rico</b>    |             |             |             |             |             |             |                | √              | √              | √              | √              | √              |
| <b>Rhode Island</b>   | √           | √           | √           | √           | √           | √           | √              | √              | √              | √              | √              | √              |
| <b>South Carolina</b> | √           | √           | √           | √           | √           | √           | √              | √              | √              | √              | √              | √              |
| <b>South Dakota</b>   |             |             |             |             |             |             |                |                |                |                | √              | √              |
| <b>Tennessee</b>      |             |             |             |             |             |             |                |                |                |                | √              | √              |
| <b>Texas</b>          |             |             |             |             |             |             |                |                |                |                | √ <sup>a</sup> | √ <sup>a</sup> |
| <b>Utah</b>           | √           | √           | √           | √           | √           | √           | √              | √              | √              | √              | √              | √              |
| <b>Vermont</b>        |             |             |             |             |             | √           | √              | √              | √              | √              | √              | √              |
| <b>Virginia</b>       | √           | √           | √           | √           | √           | √           | √              | √              | √              | √              | √              | √              |
| <b>Washington</b>     |             |             |             |             |             |             | √ <sup>c</sup> | √ <sup>c</sup> | √              | √              | √              | √              |
| <b>West Virginia</b>  |             |             |             |             |             |             |                | √              | √              | √              | √              | √              |
| <b>Wisconsin</b>      | √           | √           | √           | √           | √           | √           | √              | √              | √              | √              | √              | √              |
| <b>Wyoming</b>        |             |             |             |             |             |             |                |                |                | √              | √              | √              |
| <b>TOTAL</b>          | <b>16</b>   | <b>17</b>   | <b>17</b>   | <b>17</b>   | <b>18</b>   | <b>27</b>   | <b>32</b>      | <b>37</b>      | <b>41</b>      | <b>44</b>      | <b>50</b>      | <b>50</b>      |

**Abbreviations** NVDRS: National Violent Death Reporting System; WISQARS: Web-based Injury Statistics Query and Reporting System; RAD: Restricted Access Database; VDRS: [State/Territory/Jurisdiction] Violent Death Reporting System

**Key** √: Data included. √ without a superscripted footnote denotes jurisdiction-wide data collection, which includes data in all counties within that jurisdiction.; 0: No data included

\*Table adapted from Center for Disease Control and Prevention, National Violent Death Reporting System User Guidelines

<sup>a</sup> Some, but not all, counties in the state participated in data collection during this year.

<sup>b</sup> Excluded from this data year due to incomplete case reporting

<sup>c</sup> Collected data on >80% of violent deaths in the state, in accordance with requirements under which the state was funded.
