# Supplementary material for: Youth Suicide and Preceding Mental Health Diagnosis
Source: PubMed Central journal article supplement (PMC11289695; doi:10.1001/jamanetworkopen.2024.23996), 2024-07-30
Supplement: jamanetwopen-e2423996-s002.pdf [file jamanetwopen-e2423996-s002.pdf]

## Data Sharing Statement

Chaudhary. Youth Suicide and Preceding Mental Health Diagnosis. *JAMA Netw Open*.  
Published July 30, 2024. doi:10.1001/jamanetworkopen.2024.23996

### Data

**Data available:** No

### Additional Information

**Explanation for why data not available:** Data is CDC National Violent Death Reporting System Restricted Access Data that cannot be shared for individual patient data
